# Supplementary material for: Performances of Functional and Anatomic Imaging Modalities in Succinate Dehydrogenase A-Related Metastatic Pheochromocytoma and Paraganglioma
Source: MDPI journal article supplement (doi:10.3390/cancers14163886), 2022-08-11
Supplement: s1 [file s1]

# Supplementary Material

**Figure S1. Contingency Tables for all 11 patients comparing lesions identified on 68Ga-DOTATATE versus 18F-FDG, 18F-FDOPA, and CT/MRI**

|         |               |     |    |       |
|---------|---------------|-----|----|-------|
| =0.0853 | 68Ga-DOTATATE |     |    |       |
| 18F-FDG |               | +   | -  | total |
|         | +             | 203 | 30 | 233   |
|         | -             | 46  | 2  | 48    |
|         | total         | 249 | 32 | 281   |

|           |               |    |    |       |
|-----------|---------------|----|----|-------|
| <0.0001   | 68Ga-DOTATATE |    |    |       |
| 18F-FDOPA |               | +  | -  | total |
|           | +             | 25 | 14 | 39    |
|           | -             | 55 | 8  | 63    |
|           | total         | 80 | 22 | 102   |

  

|         |               |     |     |       |
|---------|---------------|-----|-----|-------|
| <0.0001 | 68Ga-DOTATATE |     |     |       |
| CT/MRI  |               | +   | -   | total |
|         | +             | 135 | 103 | 238   |
|         | -             | 24  | 8   | 32    |
|         | total         | 159 | 111 | 270   |

**Figure S2. Contingency Tables for 7 patients where all four imaging modalities were conducted comparing the lesions identified on 68Ga-DOTATATE versus 18F-FDG, 18F-FDOPA, and CT/MRI**

|         |               |    |    |       |
|---------|---------------|----|----|-------|
| =1.00   | 68Ga-DOTATATE |    |    |       |
| 18F-FDG |               | +  | -  | total |
|         | +             | 61 | 20 | 81    |
|         | -             | 19 | 2  | 21    |
|         | total         | 80 | 22 | 102   |

|           |               |    |    |       |
|-----------|---------------|----|----|-------|
| <0.0001   | 68Ga-DOTATATE |    |    |       |
| 18F-FDOPA |               | +  | -  | total |
|           | +             | 25 | 14 | 39    |
|           | -             | 55 | 8  | 63    |
|           | total         | 80 | 22 | 102   |

  

|         |               |    |    |       |
|---------|---------------|----|----|-------|
| <0.0010 | 68Ga-DOTATATE |    |    |       |
| CT/MRI  |               | +  | -  | total |
|         | +             | 41 | 14 | 55    |
|         | -             | 39 | 8  | 47    |
|         | total         | 80 | 22 | 102   |
